# Supplementary material for: Spread of Antigenically Drifted Influenza A(H3N2) Viruses and Vaccine Effectiveness in the United States During the 2018–2019 Season
Source: Oxford University Press journal article supplement (doi:10.1093/infdis/jiz543), 2019-10-16
Supplement: jiz543_suppl_supplementary_appendix.pdf [file jiz543_suppl_supplementary_appendix.pdf]

| ID         | Genetic classification |
|------------|------------------------|
| 3030929626 | 6B.1A                  |
| 3030929627 | 6B.1A                  |
| 3030929628 | 6B.1A                  |
| 3030929629 | 6B.1A                  |
| 3030929632 | 6B.1A                  |
| 3030929633 | 6B.1A                  |
| 3030929635 | 6B.1A                  |
| 3030929636 | 6B.1A                  |
| 3030929637 | 6B.1A                  |
| 3030929638 | 6B.1A                  |
| 3030929639 | 6B.1A                  |
| 3030929640 | 6B.1A                  |
| 3030929641 | 6B.1A                  |
| 3030929642 | 6B.1A                  |
| 3030929643 | 6B.1A                  |
| 3030929644 | 6B.1A                  |
| 3030929645 | 6B.1A                  |
| 3030929646 | 6B.1A                  |
| 3030929647 | 6B.1A                  |
| 3030929648 | 6B.1A                  |
| 3030929649 | 6B.1A                  |
| 3030929650 | 6B.1A                  |
| 3030929666 | 6B.1A                  |
| 3030929667 | 6B.1A                  |
| 3030929668 | 6B.1A                  |
| 3030929669 | 6B.1A                  |
| 3030929670 | 6B.1A                  |
| 3030929671 | 6B.1A                  |
| 3030929672 | 6B.1A                  |
| 3030929673 | 6B.1A                  |
| 3030929674 | 6B.1A                  |
| 3030929675 | 6B.1A                  |
| 3030929676 | 6B.1A                  |
| 3030929677 | 6B.1A                  |
| 3030929678 | 6B.1A                  |
| 3030929679 | 6B.1A                  |
| 3030929680 | 6B.1A                  |
| 3030929681 | 6B.1A                  |
| 3030929682 | 6B.1A                  |
| 3030929683 | 6B.1A                  |
| 3030929684 | 6B.1A                  |
| 3030929685 | 6B.1A                  |
| 3030929686 | 6B.1A                  |
| 3030929693 | 6B.1A                  |
| 3030929694 | 6B.1A                  |

| ID         | Genetic classification |
|------------|------------------------|
| 3030929695 | 6B.1A                  |
| 3030929696 | 6B.1A                  |
| 3030929697 | 6B.1A                  |
| 3030929698 | 6B.1A                  |
| 3030929699 | 6B.1A                  |
| 3030929700 | 6B.1A                  |
| 3030929701 | 6B.1A                  |
| 3030929702 | 6B.1A                  |
| 3030929703 | 6B.1A                  |
| 3030929704 | 6B.1A                  |
| 3030929705 | 6B.1A                  |
| 3030929706 | 6B.1A                  |
| 3030929707 | 6B.1A                  |
| 3030929708 | 6B.1A                  |
| 3030929709 | 6B.1A                  |
| 3030929710 | 6B.1A                  |
| 3030929711 | 6B.1A                  |
| 3030929712 | 6B.1A                  |
| 3030929713 | 6B.1A                  |
| 3030929714 | 6B.1A                  |
| 3030929715 | 6B.1A                  |
| 3030929716 | 6B.1A                  |
| 3030929717 | 6B.1A                  |
| 3030929718 | 6B.1A                  |
| 3030929719 | 6B.1A                  |
| 3030929720 | 6B.1A                  |
| 3030929721 | 6B.1A                  |
| 3030929722 | 6B.1A                  |
| 3030929723 | 6B.1A                  |
| 3030929724 | 6B.1A                  |
| 3030929725 | 6B.1A                  |
| 3030929726 | 6B.1A                  |
| 3030929727 | 6B.1A                  |
| 3030929728 | 6B.1A                  |
| 3030929729 | 6B.1A                  |
| 3030929730 | 6B.1A                  |
| 3030929731 | 6B.1A                  |
| 3030929732 | 6B.1A                  |
| 3030929734 | 6B.1A                  |
| 3030929975 | 6B.1A                  |
| 3030929976 | 6B.1A                  |
| 3030929977 | 6B.1A                  |
| 3030929978 | 6B.1A                  |
| 3030929979 | 6B.1A                  |
| 3030929980 | 6B.1A                  |

| ID         | Genetic classification |
|------------|------------------------|
| 3030929981 | 6B.1A                  |
| 3030929982 | 6B.1A                  |
| 3030929983 | 6B.1A                  |
| 3030929984 | 6B.1A                  |
| 3030929985 | 6B.1A                  |
| 3030929986 | 6B.1A                  |
| 3030929987 | 6B.1A                  |
| 3030929988 | 6B.1A                  |
| 3030929989 | 6B.1A                  |
| 3030929990 | 6B.1A                  |
| 3030929991 | 6B.1A                  |
| 3030929992 | 6B.1A                  |
| 3030929993 | 6B.1A                  |
| 3030929994 | 6B.1A                  |
| 3030929995 | 6B.1A                  |
| 3030929996 | 6B.1A                  |
| 3030929997 | 6B.1A                  |
| 3030929998 | 6B.1A                  |
| 3030929999 | 6B.1A                  |
| 3030930000 | 6B.1A                  |
| 3030930001 | 6B.1A                  |
| 3030930002 | 6B.1A                  |
| 3030930003 | 6B.1A                  |
| 3030930004 | 6B.1A                  |
| 3030930005 | 6B.1A                  |
| 3030930006 | 6B.1A                  |
| 3030930007 | 6B.1A                  |
| 3030930008 | 6B.1A                  |
| 3030930009 | 6B.1A                  |
| 3030930010 | 6B.1A                  |
| 3030930011 | 6B.1A                  |
| 3030930012 | 6B.1A                  |
| 3030930013 | 6B.1A                  |
| 3030930014 | 6B.1A                  |
| 3030930015 | 6B.1A                  |
| 3030930016 | 6B.1A                  |
| 3030930017 | 6B.1A                  |
| 3030930018 | 6B.1A                  |
| 3030930019 | 6B.1A                  |
| 3030930020 | 6B.1A                  |
| 3030930021 | 6B.1A                  |
| 3030930022 | 6B.1A                  |
| 3030930023 | 6B.1A                  |
| 3030930024 | 6B.1A                  |
| 3030930025 | 6B.1A                  |

| ID         | Genetic classification |
|------------|------------------------|
| 3030930026 | 6B.1A                  |
| 3030930027 | 6B.1A                  |
| 3030930028 | 6B.1A                  |
| 3030930029 | 6B.1A                  |
| 3030930030 | 6B.1A                  |
| 3030930031 | 6B.1A                  |
| 3030930032 | 6B.1A                  |
| 3030930034 | 6B.1A                  |
| 3030930035 | 6B.1A                  |
| 3030930036 | 6B.1A                  |
| 3030930037 | 6B.1A                  |
| 3030930038 | 6B.1A                  |
| 3030930039 | 6B.1A                  |
| 3030930063 | 6B.1A                  |
| 3030930064 | 6B.1A                  |
| 3030930065 | 6B.1A                  |
| 3030930066 | 6B.1A                  |
| 3030930067 | 6B.1A                  |
| 3030930068 | 6B.1A                  |
| 3030930069 | 6B.1A                  |
| 3030930070 | 6B.1A                  |
| 3030930071 | 6B.1A                  |
| 3030930072 | 6B.1A                  |
| 3030930073 | 6B.1A                  |
| 3030930074 | 6B.1A                  |
| 3030930075 | 6B.1A                  |
| 3030930076 | 6B.1A                  |
| 3030930078 | 6B.1A                  |
| 3030930079 | 6B.1A                  |
| 3030930080 | 6B.1A                  |
| 3030930081 | 6B.1A                  |
| 3030930082 | 6B.1A                  |
| 3030930083 | 6B.1A                  |
| 3030930085 | 6B.1A                  |
| 3030930086 | 6B.1A                  |
| 3030930087 | 6B.1A                  |
| 3030930130 | 6B.1A                  |
| 3030930131 | 6B.1A                  |
| 3030930132 | 6B.1A                  |
| 3030930133 | 6B.1A                  |
| 3030930134 | 6B.1A                  |
| 3030930135 | 6B.1A                  |
| 3030930136 | 6B.1A                  |
| 3030930137 | 6B.1A                  |
| 3030930138 | 6B.1A                  |

| ID         | Genetic classification |
|------------|------------------------|
| 3030930139 | 6B.1A                  |
| 3030930140 | 6B.1A                  |
| 3030930141 | 6B.1A                  |
| 3030930142 | 6B.1A                  |
| 3030930143 | 6B.1A                  |
| 3030930144 | 6B.1A                  |
| 3030930145 | 6B.1A                  |
| 3030930146 | 6B.1A                  |
| 3030930147 | 6B.1A                  |
| 3030930149 | 6B.1A                  |
| 3030930150 | 6B.1A                  |
| 3030930151 | 6B.1A                  |
| 3030930152 | 6B.1A                  |
| 3030930180 | 6B.1A                  |
| 3030930181 | 6B.1A                  |
| 3030930182 | 6B.1A                  |
| 3030930183 | 6B.1A                  |
| 3030930184 | 6B.1A                  |
| 3030930185 | 6B.1A                  |
| 3030930186 | 6B.1A                  |
| 3030930187 | 6B.1A                  |
| 3030930189 | 6B.1A                  |
| 3030930190 | 6B.1A                  |
| 3030930191 | 6B.1A                  |
| 3030930192 | 6B.1A                  |
| 3030930193 | 6B.1A                  |
| 3030930194 | 6B.1A                  |
| 3030930195 | 6B.1A                  |
| 3030930196 | 6B.1A                  |
| 3030930197 | 6B.1A                  |
| 3030930198 | 6B.1A                  |
| 3030930199 | 6B.1A                  |
| 3030930200 | 6B.1A                  |
| 3030930201 | 6B.1A                  |
| 3030930221 | 6B.1A                  |
| 3030930222 | 6B.1A                  |
| 3030930223 | 6B.1A                  |
| 3030930224 | 6B.1A                  |
| 3030930225 | 6B.1A                  |
| 3030930226 | 6B.1A                  |
| 3030930227 | 6B.1A                  |
| 3030930228 | 6B.1A                  |
| 3030930229 | 6B.1A                  |
| 3030930230 | 6B.1A                  |
| 3030930231 | 6B.1A                  |

| ID         | Genetic classification |
|------------|------------------------|
| 3030930232 | 6B.1A                  |
| 3030930233 | 6B.1A                  |
| 3030930234 | 6B.1A                  |
| 3030930235 | 6B.1A                  |
| 3030930236 | 6B.1A                  |
| 3030930237 | 6B.1A                  |
| 3030930238 | 6B.1A                  |
| 3030930239 | 6B.1A                  |
| 3030930240 | 6B.1A                  |
| 3030930241 | 6B.1A                  |
| 3030930254 | 6B.1A                  |
| 3030930255 | 6B.1A                  |
| 3030930256 | 6B.1A                  |
| 3030930257 | 6B.1A                  |
| 3030930258 | 6B.1A                  |
| 3030930259 | 6B.1A                  |
| 3030930260 | 6B.1A                  |
| 3030930261 | 6B.1A                  |
| 3030930262 | 6B.1A                  |
| 3030930263 | 6B.1A                  |
| 3030930264 | 6B.1A                  |
| 3030930265 | 6B.1A                  |
| 3030930266 | 6B.1A                  |
| 3030930267 | 6B.1A                  |
| 3030930268 | 6B.1A                  |
| 3030930269 | 6B.1A                  |
| 3030930270 | 6B.1A                  |
| 3030930272 | 6B.1A                  |
| 3030930273 | 6B.1A                  |
| 3030930274 | 6B.1A                  |
| 3030930275 | 6B.1A                  |
| 3030930277 | 6B.1A                  |
| 3030930278 | 6B.1A                  |
| 3030930279 | 6B.1A                  |
| 3030930280 | 6B.1A                  |
| 3030930281 | 6B.1A                  |
| 3030930282 | 6B.1A                  |
| 3030930283 | 6B.1A                  |
| 3030930284 | 6B.1A                  |
| 3030930285 | 6B.1A                  |
| 3030930286 | 6B.1A                  |
| 3030930287 | 6B.1A                  |
| 3030930288 | 6B.1A                  |
| 3030930289 | 6B.1A                  |
| 3030930335 | 6B.1A                  |

| ID         | Genetic classification |
|------------|------------------------|
| 3030930336 | 6B.1A                  |
| 3030930337 | 6B.1A                  |
| 3030930338 | 6B.1A                  |
| 3030930339 | 6B.1A                  |
| 3030930340 | 6B.1A                  |
| 3030930341 | 6B.1A                  |
| 3030930342 | 6B.1A                  |
| 3030930343 | 6B.1A                  |
| 3030930344 | 6B.1A                  |
| 3030930345 | 6B.1A                  |
| 3030930346 | 6B.1A                  |
| 3030930347 | 6B.1A                  |
| 3030930348 | 6B.1A                  |
| 3030930349 | 6B.1A                  |
| 3030930350 | 6B.1A                  |
| 3030930351 | 6B.1A                  |
| 3030930352 | 6B.1A                  |
| 3030930353 | 6B.1A                  |
| 3030930354 | 6B.1A                  |
| 3030930355 | 6B.1A                  |
| 3030930380 | 6B.1A                  |
| 3030930381 | 6B.1A                  |
| 3030930382 | 6B.1A                  |
| 3030930383 | 6B.1A                  |
| 3030930384 | 6B.1A                  |
| 3030930385 | 6B.1A                  |
| 3030930386 | 6B.1A                  |
| 3030930387 | 6B.1A                  |
| 3030930388 | 6B.1A                  |
| 3030930389 | 6B.1A                  |
| 3030930390 | 6B.1A                  |
| 3030930391 | 6B.1A                  |
| 3030930392 | 6B.1A                  |
| 3030930393 | 6B.1A                  |
| 3030930394 | 6B.1A                  |
| 3030930395 | 6B.1A                  |
| 3030930396 | 6B.1A                  |
| 3030930397 | 6B.1A                  |
| 3030930398 | 6B.1A                  |
| 3030930399 | 6B.1A                  |
| 3030930400 | 6B.1A                  |
| 3030930401 | 6B.1A                  |
| 3030930402 | 6B.1A                  |
| 3030930403 | 6B.1A                  |
| 3030930404 | 6B.1A                  |

| ID         | Genetic classification |
|------------|------------------------|
| 3030930405 | 6B.1A                  |
| 3030930406 | 6B.1A                  |
| 3030930407 | 6B.1A                  |
| 3030930408 | 6B.1A                  |
| 3030930409 | 6B.1A                  |
| 3030930410 | 6B.1A                  |
| 3030930411 | 6B.1A                  |
| 3030930412 | 6B.1A                  |
| 3030930413 | 6B.1A                  |
| 3030930414 | 6B.1A                  |
| 3030930415 | 6B.1A                  |
| 3030930416 | 6B.1A                  |
| 3030930417 | 6B.1A                  |
| 3030930418 | 6B.1A                  |
| 3030930419 | 6B.1A                  |
| 3030930420 | 6B.1A                  |
| 3030930437 | 6B.1A                  |
| 3030930438 | 6B.1A                  |
| 3030930439 | 6B.1A                  |
| 3030930440 | 6B.1A                  |
| 3030930441 | 6B.1A                  |
| 3030930442 | 6B.1A                  |
| 3030930443 | 6B.1A                  |
| 3030930444 | 6B.1A                  |
| 3030930445 | 6B.1A                  |
| 3030930446 | 6B.1A                  |
| 3030930447 | 6B.1A                  |
| 3030930448 | 6B.1A                  |
| 3030930449 | 6B.1A                  |
| 3030930450 | 6B.1A                  |
| 3030930451 | 6B.1A                  |
| 3030930452 | 6B.1A                  |
| 3030930453 | 6B.1A                  |
| 3030930454 | 6B.1A                  |
| 3030930455 | 6B.1A                  |
| 3030930457 | 6B.1A                  |
| 3030930458 | 6B.1A                  |
| 3030930459 | 6B.1A                  |
| 3030930460 | 6B.1A                  |
| 3030930517 | 6B.1A                  |
| 3030930531 | 6B.1A                  |
| 3030930532 | 6B.1A                  |
| 3030930533 | 6B.1A                  |
| 3030930534 | 6B.1A                  |
| 3030930535 | 6B.1A                  |



| ID         | Genetic classification |
|------------|------------------------|
| 3030930536 | 6B.1A                  |
| 3030930537 | 6B.1A                  |
| 3030930538 | 6B.1A                  |
| 3030930539 | 6B.1A                  |
| 3030930540 | 6B.1A                  |
| 3030930541 | 6B.1A                  |
| 3030930542 | 6B.1A                  |
| 3030930543 | 6B.1A                  |
| 3030930544 | 6B.1A                  |
| 3030930545 | 6B.1A                  |
| 3030930546 | 6B.1A                  |
| 3030930547 | 6B.1A                  |
| 3030930548 | 6B.1A                  |
| 3030930549 | 6B.1A                  |
| 3030930550 | 6B.1A                  |
| 3030930561 | 6B.1A                  |
| 3030930562 | 6B.1A                  |
| 3030930563 | 6B.1A                  |
| 3030930564 | 6B.1A                  |
| 3030930565 | 6B.1A                  |
| 3030930566 | 6B.1A                  |
| 3030930567 | 6B.1A                  |
| 3030930568 | 6B.1A                  |
| 3030930569 | 6B.1A                  |
| 3030930570 | 6B.1A                  |
| 3030930571 | 6B.1A                  |
| 3030930572 | 6B.1A                  |
| 3030930573 | 6B.1A                  |
| 3030930574 | 6B.1A                  |
| 3030930575 | 6B.1A                  |
| 3030930576 | 6B.1A                  |
| 3030930577 | 6B.1A                  |
| 3030930578 | 6B.1A                  |
| 3030930579 | 6B.1A                  |
| 3030930580 | 6B.1A                  |
| 3030930581 | 6B.1A                  |
| 3030930582 | 6B.1A                  |
| 3030930583 | 6B.1A                  |
| 3030930636 | 6B.1A                  |
| 3030930637 | 6B.1A                  |
| 3030930638 | 6B.1A                  |
| 3030930639 | 6B.1A                  |
| 3030930640 | 6B.1A                  |
| 3030930641 | 6B.1A                  |
| 3030930642 | 6B.1A                  |

| ID         | Genetic classification |
|------------|------------------------|
| 3030930643 | 6B.1A                  |
| 3030930644 | 6B.1A                  |
| 3030930645 | 6B.1A                  |
| 3030930646 | 6B.1A                  |
| 3030930647 | 6B.1A                  |
| 3030930648 | 6B.1A                  |
| 3030930649 | 6B.1A                  |
| 3030930650 | 6B.1A                  |
| 3030930651 | 6B.1A                  |
| 3030930652 | 6B.1A                  |
| 3030930653 | 6B.1A                  |
| 3030930654 | 6B.1A                  |
| 3030930655 | 6B.1A                  |
| 3030930656 | 6B.1A                  |
| 3030930657 | 6B.1A                  |
| 3030930658 | 6B.1A                  |
| 3030930659 | 6B.1A                  |
| 3030930660 | 6B.1A                  |
| 3030930661 | 6B.1A                  |
| 3030930662 | 6B.1A                  |
| 3030930663 | 6B.1A                  |
| 3030930664 | 6B.1A                  |
| 3030930665 | 6B.1A                  |
| 3030930666 | 6B.1A                  |
| 3030930667 | 6B.1A                  |
| 3030930668 | 6B.1A                  |
| 3030930669 | 6B.1A                  |
| 3030930670 | 6B.1A                  |
| 3030930671 | 6B.1A                  |
| 3030930672 | 6B.1A                  |
| 3030930673 | 6B.1A                  |
| 3030930675 | 6B.1A                  |
| 3030930676 | 6B.1A                  |
| 3030930677 | 6B.1A                  |
| 3030930678 | 6B.1A                  |
| 3030930679 | 6B.1A                  |
| 3030930680 | 6B.1A                  |
| 3030930681 | 6B.1A                  |
| 3030930682 | 6B.1A                  |
| 3030930684 | 6B.1A                  |
| 3030930685 | 6B.1A                  |
| 3030930686 | 6B.1A                  |
| 3030930687 | 6B.1A                  |
| 3030930689 | 6B.1A                  |
| 3030930690 | 6B.1A                  |

| ID         | Genetic classification |
|------------|------------------------|
| 3030930691 | 6B.1A                  |
| 3030930692 | 6B.1A                  |
| 3030930693 | 6B.1A                  |
| 3030930694 | 6B.1A                  |
| 3030930695 | 6B.1A                  |
| 3030930697 | 6B.1A                  |
| 3030930698 | 6B.1A                  |
| 3030930699 | 6B.1A                  |
| 3030930700 | 6B.1A                  |
| 3030930701 | 6B.1A                  |
| 3030930702 | 6B.1A                  |
| 3030930703 | 6B.1A                  |
| 3030930704 | 6B.1A                  |
| 3030930705 | 6B.1A                  |
| 3030930706 | 6B.1A                  |
| 3030930707 | 6B.1A                  |
| 3030930708 | 6B.1A                  |
| 3030930709 | 6B.1A                  |
| 3030930710 | 6B.1A                  |
| 3030930711 | 6B.1A                  |
| 3030930712 | 6B.1A                  |
| 3030930713 | 6B.1A                  |
| 3030930714 | 6B.1A                  |
| 3030930715 | 6B.1A                  |
| 3030930716 | 6B.1A                  |
| 3030930717 | 6B.1A                  |
| 3030930718 | 6B.1A                  |
| 3030930719 | 6B.1A                  |
| 3030930721 | 6B.1A                  |
| 3030930722 | 6B.1A                  |
| 3030930723 | 6B.1A                  |
| 3030930805 | 6B.1A                  |
| 3030930806 | 6B.1A                  |
| 3030930807 | 6B.1A                  |
| 3030930808 | 6B.1A                  |
| 3030930810 | 6B.1A                  |
| 3030930811 | 6B.1A                  |
| 3030930812 | 6B.1A                  |
| 3030930813 | 6B.1A                  |
| 3030930814 | 6B.1A                  |
| 3030930815 | 6B.1A                  |
| 3030930816 | 6B.1A                  |
| 3030930817 | 6B.1A                  |
| 3030930818 | 6B.1A                  |
| 3030930819 | 6B.1A                  |

| ID         | Genetic classification |
|------------|------------------------|
| 3030930820 | 6B.1A                  |
| 3030930821 | 6B.1A                  |
| 3030930822 | 6B.1A                  |
| 3030930823 | 6B.1A                  |
| 3030930824 | 6B.1A                  |
| 3030930825 | 6B.1A                  |
| 3030930826 | 6B.1A                  |
| 3030930827 | 6B.1A                  |
| 3030930828 | 6B.1A                  |
| 3030930829 | 6B.1A                  |
| 3030930830 | 6B.1A                  |
| 3030930831 | 6B.1A                  |
| 3030930832 | 6B.1A                  |
| 3030930833 | 6B.1A                  |
| 3030930834 | 6B.1A                  |
| 3030930835 | 6B.1A                  |
| 3030930892 | 6B.1A                  |
| 3030930893 | 6B.1A                  |
| 3030930894 | 6B.1A                  |
| 3030930895 | 6B.1A                  |
| 3030930896 | 6B.1A                  |
| 3030930897 | 6B.1A                  |
| 3030930898 | 6B.1A                  |
| 3030930899 | 6B.1A                  |
| 3030930900 | 6B.1A                  |
| 3030930901 | 6B.1A                  |
| 3030930902 | 6B.1A                  |
| 3030930903 | 6B.1A                  |
| 3030930904 | 6B.1A                  |
| 3030930905 | 6B.1A                  |
| 3030930906 | 6B.1A                  |
| 3030930907 | 6B.1A                  |
| 3030930908 | 6B.1A                  |
| 3030930909 | 6B.1A                  |
| 3030930910 | 6B.1A                  |
| 3030930911 | 6B.1A                  |
| 3030930934 | 6B.1A                  |
| 3030930935 | 6B.1A                  |
| 3030930936 | 6B.1A                  |
| 3030930937 | 6B.1A                  |
| 3030930938 | 6B.1A                  |
| 3030930939 | 6B.1A                  |
| 3030930940 | 6B.1A                  |
| 3030930941 | 6B.1A                  |
| 3030930942 | 6B.1A                  |

| ID         | Genetic classification |
|------------|------------------------|
| 3030930943 | 6B.1A                  |
| 3030930944 | 6B.1A                  |
| 3030930945 | 6B.1A                  |
| 3030930946 | 6B.1A                  |
| 3030930947 | 6B.1A                  |
| 3030930948 | 6B.1A                  |
| 3030930949 | 6B.1A                  |
| 3030930950 | 6B.1A                  |
| 3030931099 | 6B.1A                  |
| 3030931100 | 6B.1A                  |
| 3030931101 | 6B.1A                  |
| 3030931102 | 6B.1A                  |
| 3030931103 | 6B.1A                  |
| 3030931104 | 6B.1A                  |
| 3030931105 | 6B.1A                  |
| 3030931106 | 6B.1A                  |
| 3030931107 | 6B.1A                  |
| 3030931108 | 6B.1A                  |
| 3030931109 | 6B.1A                  |
| 3030931110 | 6B.1A                  |
| 3030931111 | 6B.1A                  |
| 3030931112 | 6B.1A                  |
| 3030931114 | 6B.1A                  |
| 3030931150 | 6B.1A                  |
| 3030931151 | 6B.1A                  |
| 3030931152 | 6B.1A                  |
| 3030931153 | 6B.1A                  |
| 3030931154 | 6B.1A                  |
| 3030931155 | 6B.1A                  |
| 3030931156 | 6B.1A                  |
| 3030931157 | 6B.1A                  |
| 3030931158 | 6B.1A                  |
| 3030931159 | 6B.1A                  |
| 3030931160 | 6B.1A                  |
| 3030931161 | 6B.1A                  |
| 3030931162 | 6B.1A                  |
| 3030931164 | 6B.1A                  |
| 3030931165 | 6B.1A                  |
| 3030931166 | 6B.1A                  |
| 3030931167 | 6B.1A                  |
| 3030931168 | 6B.1A                  |
| 3030931169 | 6B.1A                  |
| 3030931170 | 6B.1A                  |
| 3030931171 | 6B.1A                  |
| 3030931172 | 6B.1A                  |

| ID         | Genetic classification |
|------------|------------------------|
| 3030931173 | 6B.1A                  |
| 3030931213 | 6B.1A                  |
| 3030931214 | 6B.1A                  |
| 3030931215 | 6B.1A                  |
| 3030931216 | 6B.1A                  |
| 3030931217 | 6B.1A                  |
| 3030931218 | 6B.1A                  |
| 3030931219 | 6B.1A                  |
| 3030931220 | 6B.1A                  |
| 3030931222 | 6B.1A                  |
| 3030931223 | 6B.1A                  |
| 3030931224 | 6B.1A                  |
| 3030931225 | 6B.1A                  |
| 3030931227 | 6B.1A                  |
| 3030931228 | 6B.1A                  |
| 3030931229 | 6B.1A                  |
| 3030931230 | 6B.1A                  |
| 3030931231 | 6B.1A                  |
| 3030931232 | 6B.1A                  |
| 3030931233 | 6B.1A                  |
| 3030931234 | 6B.1A                  |
| 3030931235 | 6B.1A                  |
| 3030931236 | 6B.1A                  |
| 3030931237 | 6B.1A                  |
| 3030931238 | 6B.1A                  |
| 3030931239 | 6B.1A                  |
| 3030931240 | 6B.1A                  |
| 3030931241 | 6B.1A                  |
| 3030931242 | 6B.1A                  |
| 3030931243 | 6B.1A                  |
| 3030931244 | 6B.1A                  |
| 3030931245 | 6B.1A                  |
| 3030931246 | 6B.1A                  |
| 3030931247 | 6B.1A                  |
| 3030931248 | 6B.1A                  |
| 3030931249 | 6B.1A                  |
| 3030931250 | 6B.1A                  |
| 3030931251 | 6B.1A                  |
| 3030931252 | 6B.1A                  |
| 3030931253 | 6B.1A                  |
| 3030931254 | 6B.1A                  |
| 3030931255 | 6B.1A                  |
| 3030931257 | 6B.1A                  |
| 3030931258 | 6B.1A                  |
| 3030931259 | 6B.1A                  |

| ID         | Genetic classification |
|------------|------------------------|
| 3030931260 | 6B.1A                  |
| 3030931261 | 6B.1A                  |
| 3030931262 | 6B.1A                  |
| 3030931263 | 6B.1A                  |
| 3030931264 | 6B.1A                  |
| 3030931265 | 6B.1A                  |
| 3030931266 | 6B.1A                  |
| 3030931267 | 6B.1A                  |
| 3030931268 | 6B.1A                  |
| 3030931269 | 6B.1A                  |
| 3030931270 | 6B.1A                  |
| 3030931271 | 6B.1A                  |
| 3030931272 | 6B.1A                  |
| 3030931273 | 6B.1A                  |
| 3030931274 | 6B.1A                  |
| 3030931275 | 6B.1A                  |
| 3030931276 | 6B.1A                  |
| 3030931277 | 6B.1A                  |
| 3030931279 | 6B.1A                  |
| 3030931280 | 6B.1A                  |
| 3030931281 | 6B.1A                  |
| 3030931282 | 6B.1A                  |
| 3030931283 | 6B.1A                  |
| 3030931284 | 6B.1A                  |
| 3030931285 | 6B.1A                  |
| 3030931286 | 6B.1A                  |
| 3030931287 | 6B.1A                  |
| 3030931288 | 6B.1A                  |
| 3030931289 | 6B.1A                  |
| 3030931290 | 6B.1A                  |
| 3030931291 | 6B.1A                  |
| 3030931292 | 6B.1A                  |
| 3030931293 | 6B.1A                  |
| 3030931295 | 6B.1A                  |
| 3030931296 | 6B.1A                  |
| 3030931297 | 6B.1A                  |
| 3030931298 | 6B.1A                  |
| 3030931299 | 6B.1A                  |
| 3030931300 | 6B.1A                  |
| 3030931301 | 6B.1A                  |
| 3030931303 | 6B.1A                  |
| 3030931304 | 6B.1A                  |
| 3030931305 | 6B.1A                  |
| 3030931306 | 6B.1A                  |
| 3030931307 | 6B.1A                  |

| ID         | Genetic classification |
|------------|------------------------|
| 3030931308 | 6B.1A                  |
| 3030931309 | 6B.1A                  |
| 3030931310 | 6B.1A                  |
| 3030931311 | 6B.1A                  |
| 3030931312 | 6B.1A                  |
| 3030931313 | 6B.1A                  |
| 3030931314 | 6B.1A                  |
| 3030931316 | 6B.1A                  |
| 3030931317 | 6B.1A                  |
| 3030931318 | 6B.1A                  |
| 3030931319 | 6B.1A                  |
| 3030931320 | 6B.1A                  |
| 3030931321 | 6B.1A                  |
| 3030931323 | 6B.1A                  |
| 3030931324 | 6B.1A                  |
| 3030931325 | 6B.1A                  |
| 3030931326 | 6B.1A                  |
| 3030931327 | 6B.1A                  |
| 3030931328 | 6B.1A                  |
| 3030931329 | 6B.1A                  |
| 3030931330 | 6B.1A                  |
| 3030931331 | 6B.1A                  |
| 3030931332 | 6B.1A                  |
| 3030931333 | 6B.1A                  |
| 3030931334 | 6B.1A                  |
| 3030931335 | 6B.1A                  |
| 3030931336 | 6B.1A                  |
| 3030931337 | 6B.1A                  |
| 3030931338 | 6B.1A                  |
| 3030931339 | 6B.1A                  |
| 3030931340 | 6B.1A                  |
| 3030931341 | 6B.1A                  |
| 3030931342 | 6B.1A                  |
| 3030931343 | 6B.1A                  |
| 3030931344 | 6B.1A                  |
| 3030931345 | 6B.1A                  |
| 3030931346 | 6B.1A                  |
| 3030931347 | 6B.1A                  |
| 3030931348 | 6B.1A                  |
| 3030931349 | 6B.1A                  |
| 3030931350 | 6B.1A                  |
| 3030931351 | 6B.1A                  |
| 3030931352 | 6B.1A                  |
| 3030931353 | 6B.1A                  |
| 3030931354 | 6B.1A                  |



| ID         | Genetic classification |
|------------|------------------------|
| 3030931355 | 6B.1A                  |
| 3030931356 | 6B.1A                  |
| 3030931357 | 6B.1A                  |
| 3030931358 | 6B.1A                  |
| 3030931359 | 6B.1A                  |
| 3030931360 | 6B.1A                  |
| 3030931361 | 6B.1A                  |
| 3030931362 | 6B.1A                  |
| 3030931363 | 6B.1A                  |
| 3030931580 | 6B.1A                  |
| 3030931581 | 6B.1A                  |
| 3030931582 | 6B.1A                  |
| 3030931583 | 6B.1A                  |
| 3030931584 | 6B.1A                  |
| 3030931585 | 6B.1A                  |
| 3030931586 | 6B.1A                  |
| 3030931816 | 6B.1A                  |
| 3030931817 | 6B.1A                  |
| 3030931818 | 6B.1A                  |
| 3030931819 | 6B.1A                  |
| 3030931820 | 6B.1A                  |
| 3030931821 | 6B.1A                  |
| 3030931822 | 6B.1A                  |
| 3030931823 | 6B.1A                  |
| 3030931824 | 6B.1A                  |
| 3030931825 | 6B.1A                  |
| 3030931826 | 6B.1A                  |
| 3030931827 | 6B.1A                  |
| 3030931828 | 6B.1A                  |
| 3030931829 | 6B.1A                  |
| 3030931830 | 6B.1A                  |
| 3030931831 | 6B.1A                  |
| 3030931832 | 6B.1A                  |
| 3030931833 | 6B.1A                  |
| 3030931834 | 6B.1A                  |
| 3030931835 | 6B.1A                  |
| 3030931836 | 6B.1A                  |
| 3030931838 | 6B.1A                  |
| 3030931839 | 6B.1A                  |
| 3030931840 | 6B.1A                  |
| 3030931841 | 6B.1A                  |
| 3030931842 | 6B.1A                  |
| 3030931843 | 6B.1A                  |
| 3030931845 | 6B.1A                  |
| 3030931846 | 6B.1A                  |

| ID         | Genetic classification |
|------------|------------------------|
| 3030931847 | 6B.1A                  |
| 3030931848 | 6B.1A                  |
| 3030931850 | 6B.1A                  |
| 3030931851 | 6B.1A                  |
| 3030931852 | 6B.1A                  |
| 3030931853 | 6B.1A                  |
| 3030931854 | 6B.1A                  |
| 3030931855 | 6B.1A                  |
| 3030931856 | 6B.1A                  |
| 3030931857 | 6B.1A                  |
| 3030931858 | 6B.1A                  |
| 3030931859 | 6B.1A                  |
| 3030931860 | 6B.1A                  |
| 3030931861 | 6B.1A                  |
| 3030931862 | 6B.1A                  |
| 3030931863 | 6B.1A                  |
| 3030931864 | 6B.1A                  |
| 3030931865 | 6B.1A                  |
| 3030931866 | 6B.1A                  |
| 3030931867 | 6B.1A                  |
| 3030931868 | 6B.1A                  |
| 3030931869 | 6B.1A                  |
| 3030931870 | 6B.1A                  |
| 3030931871 | 6B.1A                  |
| 3030931872 | 6B.1A                  |
| 3030931873 | 6B.1A                  |
| 3030931874 | 6B.1A                  |
| 3030931875 | 6B.1A                  |
| 3030931876 | 6B.1A                  |
| 3030931877 | 6B.1A                  |
| 3030931878 | 6B.1A                  |
| 3030931879 | 6B.1A                  |
| 3030931880 | 6B.1A                  |
| 3030931881 | 6B.1A                  |
| 3030931882 | 6B.1A                  |
| 3030931883 | 6B.1A                  |
| 3030931884 | 6B.1A                  |
| 3030931885 | 6B.1A                  |
| 3030931886 | 6B.1A                  |
| 3030931887 | 6B.1A                  |
| 3030931888 | 6B.1A                  |
| 3030931889 | 6B.1A                  |
| 3030931890 | 6B.1A                  |
| 3030931891 | 6B.1A                  |
| 3030931892 | 6B.1A                  |

| ID         | Genetic classification |
|------------|------------------------|
| 3030931893 | 6B.1A                  |
| 3030931894 | 6B.1A                  |
| 3030931895 | 6B.1A                  |
| 3030931896 | 6B.1A                  |
| 3030931897 | 6B.1A                  |
| 3030931898 | 6B.1A                  |
| 3030931899 | 6B.1A                  |
| 3030931900 | 6B.1A                  |
| 3030931901 | 6B.1A                  |
| 3030931902 | 6B.1A                  |
| 3030931903 | 6B.1A                  |
| 3030931904 | 6B.1A                  |
| 3030931905 | 6B.1A                  |
| 3030931907 | 6B.1A                  |
| 3030931908 | 6B.1A                  |
| 3030931909 | 6B.1A                  |
| 3030931910 | 6B.1A                  |
| 3030931911 | 6B.1A                  |
| 3030931912 | 6B.1A                  |
| 3030931913 | 6B.1A                  |
| 3030931914 | 6B.1A                  |
| 3030931915 | 6B.1A                  |
| 3030931916 | 6B.1A                  |
| 3030931917 | 6B.1A                  |
| 3030931918 | 6B.1A                  |
| 3030931919 | 6B.1A                  |
| 3030931920 | 6B.1A                  |
| 3030931921 | 6B.1A                  |
| 3030931922 | 6B.1A                  |
| 3030931923 | 6B.1A                  |
| 3030931924 | 6B.1A                  |
| 3030931925 | 6B.1A                  |
| 3030931926 | 6B.1A                  |
| 3030931959 | 6B.1A                  |
| 3030931960 | 6B.1A                  |
| 3030931961 | 6B.1A                  |
| 3030931962 | 6B.1A                  |
| 3030931963 | 6B.1A                  |
| 3030931964 | 6B.1A                  |
| 3030931965 | 6B.1A                  |
| 3030931966 | 6B.1A                  |
| 3030931967 | 6B.1A                  |
| 3030931968 | 6B.1A                  |
| 3030931969 | 6B.1A                  |
| 3030931970 | 6B.1A                  |

| ID         | Genetic classification |
|------------|------------------------|
| 3030931971 | 6B.1A                  |
| 3030931972 | 6B.1A                  |
| 3030931973 | 6B.1A                  |
| 3030931974 | 6B.1A                  |
| 3030931996 | 6B.1A                  |
| 3030931997 | 6B.1A                  |
| 3030931998 | 6B.1A                  |
| 3030931999 | 6B.1A                  |
| 3030932000 | 6B.1A                  |
| 3030932001 | 6B.1A                  |
| 3030932002 | 6B.1A                  |
| 3030932003 | 6B.1A                  |
| 3030932004 | 6B.1A                  |
| 3030932005 | 6B.1A                  |
| 3030932006 | 6B.1A                  |
| 3030932007 | 6B.1A                  |
| 3030932008 | 6B.1A                  |
| 3030932009 | 6B.1A                  |
| 3030932010 | 6B.1A                  |
| 3030932011 | 6B.1A                  |
| 3030932012 | 6B.1A                  |
| 3030932013 | 6B.1A                  |
| 3030932124 | 6B.1A                  |
| 3030932125 | 6B.1A                  |
| 3030932126 | 6B.1A                  |
| 3030932127 | 6B.1A                  |
| 3030932128 | 6B.1A                  |
| 3030932129 | 6B.1A                  |
| 3030932130 | 6B.1A                  |
| 3030932131 | 6B.1A                  |
| 3030932132 | 6B.1A                  |
| 3030932133 | 6B.1A                  |
| 3030932134 | 6B.1A                  |
| 3030932135 | 6B.1A                  |
| 3030932136 | 6B.1A                  |
| 3030932138 | 6B.1A                  |
| 3030932139 | 6B.1A                  |
| 3030932140 | 6B.1A                  |
| 3030932141 | 6B.1A                  |
| 3030932142 | 6B.1A                  |
| 3030932143 | 6B.1A                  |
| 3030932144 | 6B.1A                  |
| 3030932145 | 6B.1A                  |
| 3030932146 | 6B.1A                  |
| 3030932147 | 6B.1A                  |

| ID         | Genetic classification |
|------------|------------------------|
| 3030932148 | 6B.1A                  |
| 3030932149 | 6B.1A                  |
| 3030932150 | 6B.1A                  |
| 3030932151 | 6B.1A                  |
| 3030932152 | 6B.1A                  |
| 3030932153 | 6B.1A                  |
| 3030932154 | 6B.1A                  |
| 3030932155 | 6B.1A                  |
| 3030932156 | 6B.1A                  |
| 3030932157 | 6B.1A                  |
| 3030932158 | 6B.1A                  |
| 3030932159 | 6B.1A                  |
| 3030932160 | 6B.1A                  |
| 3030932161 | 6B.1A                  |
| 3030932162 | 6B.1A                  |
| 3030932164 | 6B.1A                  |
| 3030932165 | 6B.1A                  |
| 3030932166 | 6B.1A                  |
| 3030932167 | 6B.1A                  |
| 3030932168 | 6B.1A                  |
| 3030932169 | 6B.1A                  |
| 3030932170 | 6B.1A                  |
| 3030932171 | 6B.1A                  |
| 3030932172 | 6B.1A                  |
| 3030932173 | 6B.1A                  |
| 3030932174 | 6B.1A                  |
| 3030932337 | 6B.1A                  |
| 3030932338 | 6B.1A                  |
| 3030932339 | 6B.1A                  |
| 3030932340 | 6B.1A                  |
| 3030932341 | 6B.1A                  |
| 3030932342 | 6B.1A                  |
| 3030932343 | 6B.1A                  |
| 3030932344 | 6B.1A                  |
| 3030932345 | 6B.1A                  |
| 3030932346 | 6B.1A                  |
| 3030932347 | 6B.1A                  |
| 3030932348 | 6B.1A                  |
| 3030932349 | 6B.1A                  |
| 3030932350 | 6B.1A                  |
| 3030932351 | 6B.1A                  |
| 3030932352 | 6B.1A                  |
| 3030932353 | 6B.1A                  |
| 3030932354 | 6B.1A                  |
| 3030932355 | 6B.1A                  |

| ID         | Genetic classification |
|------------|------------------------|
| 3030932356 | 6B.1A                  |
| 3030932357 | 6B.1A                  |
| 3030932358 | 6B.1A                  |
| 3030932359 | 6B.1A                  |
| 3030932360 | 6B.1A                  |
| 3030932361 | 6B.1A                  |
| 3030932362 | 6B.1A                  |
| 3030932363 | 6B.1A                  |
| 3030932364 | 6B.1A                  |
| 3030932365 | 6B.1A                  |
| 3030932366 | 6B.1A                  |
| 3030932367 | 6B.1A                  |
| 3030932368 | 6B.1A                  |
| 3030932369 | 6B.1A                  |
| 3030932370 | 6B.1A                  |
| 3030932371 | 6B.1A                  |
| 3030932372 | 6B.1A                  |
| 3030932411 | 6B.1A                  |
| 3030932412 | 6B.1A                  |
| 3030932413 | 6B.1A                  |
| 3030932414 | 6B.1A                  |
| 3030932415 | 6B.1A                  |
| 3030932416 | 6B.1A                  |
| 3030932417 | 6B.1A                  |
| 3030932446 | 6B.1A                  |
| 3030932447 | 6B.1A                  |
| 3030932448 | 6B.1A                  |
| 3030932449 | 6B.1A                  |
| 3030932450 | 6B.1A                  |
| 3030932451 | 6B.1A                  |
| 3030932452 | 6B.1A                  |
| 3030932453 | 6B.1A                  |
| 3030932454 | 6B.1A                  |
| 3030932455 | 6B.1A                  |
| 3030932456 | 6B.1A                  |
| 3030932457 | 6B.1A                  |
| 3030932458 | 6B.1A                  |
| 3030932459 | 6B.1A                  |
| 3030932460 | 6B.1A                  |
| 3030932461 | 6B.1A                  |
| 3030932462 | 6B.1A                  |
| 3030932463 | 6B.1A                  |
| 3030932464 | 6B.1A                  |
| 3030932478 | 6B.1A                  |
| 3030932479 | 6B.1A                  |

| ID         | Genetic classification |
|------------|------------------------|
| 3030932480 | 6B.1A                  |
| 3030932481 | 6B.1A                  |
| 3030932482 | 6B.1A                  |
| 3030932625 | 6B.1A                  |
| 3030932626 | 6B.1A                  |
| 3030932627 | 6B.1A                  |
| 3030932628 | 6B.1A                  |
| 3030932629 | 6B.1A                  |
| 3030932630 | 6B.1A                  |
| 3030932631 | 6B.1A                  |
| 3030932632 | 6B.1A                  |
| 3030932633 | 6B.1A                  |
| 3030932634 | 6B.1A                  |
| 3030932635 | 6B.1A                  |
| 3030932636 | 6B.1A                  |
| 3030932637 | 6B.1A                  |
| 3030932638 | 6B.1A                  |
| 3030932639 | 6B.1A                  |
| 3030932640 | 6B.1A                  |
| 3030932641 | 6B.1A                  |
| 3030932642 | 6B.1A                  |
| 3030932643 | 6B.1A                  |
| 3030932644 | 6B.1A                  |
| 3030932645 | 6B.1A                  |
| 3030932646 | 6B.1A                  |
| 3030932647 | 6B.1A                  |
| 3030932648 | 6B.1A                  |
| 3030932649 | 6B.1A                  |
| 3030932650 | 6B.1A                  |
| 3030932651 | 6B.1A                  |
| 3030932652 | 6B.1A                  |
| 3030932653 | 6B.1A                  |
| 3030932654 | 6B.1A                  |
| 3030932655 | 6B.1A                  |
| 3030932656 | 6B.1A                  |
| 3030933048 | 6B.1A                  |
| 3030933049 | 6B.1A                  |
| 3030933050 | 6B.1A                  |
| 3030933051 | 6B.1A                  |
| 3030933052 | 6B.1A                  |
| 3030933053 | 6B.1A                  |
| 3030933054 | 6B.1A                  |
| 3030933055 | 6B.1A                  |
| 3030933056 | 6B.1A                  |
| 3030933057 | 6B.1A                  |

| ID         | Genetic classification |
|------------|------------------------|
| 3030930587 | 3C.2a                  |
| 3030931620 | 3C.2a                  |
| 3030931623 | 3C.2a                  |
| 3030929630 | 3C.2a1                 |
| 3030929651 | 3C.2a1                 |
| 3030929653 | 3C.2a1                 |
| 3030929654 | 3C.2a1                 |
| 3030929655 | 3C.2a1                 |
| 3030929664 | 3C.2a1                 |
| 3030929665 | 3C.2a1                 |
| 3030929688 | 3C.2a1                 |
| 3030929691 | 3C.2a1                 |
| 3030929735 | 3C.2a1                 |
| 3030929736 | 3C.2a1                 |
| 3030930041 | 3C.2a1                 |
| 3030930048 | 3C.2a1                 |
| 3030930088 | 3C.2a1                 |
| 3030930217 | 3C.2a1                 |
| 3030930218 | 3C.2a1                 |
| 3030930245 | 3C.2a1                 |
| 3030930246 | 3C.2a1                 |
| 3030930251 | 3C.2a1                 |
| 3030930553 | 3C.2a1                 |
| 3030930555 | 3C.2a1                 |
| 3030930556 | 3C.2a1                 |
| 3030930588 | 3C.2a1                 |
| 3030930856 | 3C.2a1                 |
| 3030930861 | 3C.2a1                 |
| 3030930868 | 3C.2a1                 |
| 3030930913 | 3C.2a1                 |
| 3030930914 | 3C.2a1                 |
| 3030930916 | 3C.2a1                 |
| 3030930917 | 3C.2a1                 |
| 3030930921 | 3C.2a1                 |
| 3030930952 | 3C.2a1                 |
| 3030930953 | 3C.2a1                 |
| 3030931123 | 3C.2a1                 |
| 3030931135 | 3C.2a1                 |
| 3030931182 | 3C.2a1                 |
| 3030931366 | 3C.2a1                 |
| 3030931371 | 3C.2a1                 |
| 3030931396 | 3C.2a1                 |
| 3030931406 | 3C.2a1                 |
| 3030931627 | 3C.2a1                 |
| 3030931636 | 3C.2a1                 |



| ID         | Genetic classification |
|------------|------------------------|
| 3030931653 | 3C.2a1                 |
| 3030931657 | 3C.2a1                 |
| 3030931675 | 3C.2a1                 |
| 3030931693 | 3C.2a1                 |
| 3030931694 | 3C.2a1                 |
| 3030931763 | 3C.2a1                 |
| 3030931770 | 3C.2a1                 |
| 3030931775 | 3C.2a1                 |
| 3030931777 | 3C.2a1                 |
| 3030931782 | 3C.2a1                 |
| 3030931786 | 3C.2a1                 |
| 3030931787 | 3C.2a1                 |
| 3030931792 | 3C.2a1                 |
| 3030931810 | 3C.2a1                 |
| 3030931979 | 3C.2a1                 |
| 3030931991 | 3C.2a1                 |
| 3030932064 | 3C.2a1                 |
| 3030932075 | 3C.2a1                 |
| 3030932082 | 3C.2a1                 |
| 3030932252 | 3C.2a1                 |
| 3030932267 | 3C.2a1                 |
| 3030932274 | 3C.2a1                 |
| 3030932277 | 3C.2a1                 |
| 3030932293 | 3C.2a1                 |
| 3030932298 | 3C.2a1                 |
| 3030932317 | 3C.2a1                 |
| 3030932318 | 3C.2a1                 |
| 3030932319 | 3C.2a1                 |
| 3030932333 | 3C.2a1                 |
| 3030932444 | 3C.2a1                 |
| 3030932530 | 3C.2a1                 |
| 3030932533 | 3C.2a1                 |
| 3030929652 | 3C.3a                  |
| 3030929656 | 3C.3a                  |
| 3030929663 | 3C.3a                  |
| 3030929687 | 3C.3a                  |
| 3030929689 | 3C.3a                  |
| 3030929690 | 3C.3a                  |
| 3030929692 | 3C.3a                  |
| 3030929737 | 3C.3a                  |
| 3030930040 | 3C.3a                  |
| 3030930042 | 3C.3a                  |
| 3030930043 | 3C.3a                  |
| 3030930044 | 3C.3a                  |
| 3030930045 | 3C.3a                  |

| ID         | Genetic classification |
|------------|------------------------|
| 3030930046 | 3C.3a                  |
| 3030930047 | 3C.3a                  |
| 3030930049 | 3C.3a                  |
| 3030930050 | 3C.3a                  |
| 3030930051 | 3C.3a                  |
| 3030930052 | 3C.3a                  |
| 3030930053 | 3C.3a                  |
| 3030930054 | 3C.3a                  |
| 3030930061 | 3C.3a                  |
| 3030930062 | 3C.3a                  |
| 3030930090 | 3C.3a                  |
| 3030930091 | 3C.3a                  |
| 3030930153 | 3C.3a                  |
| 3030930154 | 3C.3a                  |
| 3030930155 | 3C.3a                  |
| 3030930156 | 3C.3a                  |
| 3030930157 | 3C.3a                  |
| 3030930158 | 3C.3a                  |
| 3030930159 | 3C.3a                  |
| 3030930160 | 3C.3a                  |
| 3030930161 | 3C.3a                  |
| 3030930162 | 3C.3a                  |
| 3030930163 | 3C.3a                  |
| 3030930202 | 3C.3a                  |
| 3030930203 | 3C.3a                  |
| 3030930204 | 3C.3a                  |
| 3030930205 | 3C.3a                  |
| 3030930206 | 3C.3a                  |
| 3030930207 | 3C.3a                  |
| 3030930208 | 3C.3a                  |
| 3030930209 | 3C.3a                  |
| 3030930210 | 3C.3a                  |
| 3030930211 | 3C.3a                  |
| 3030930212 | 3C.3a                  |
| 3030930213 | 3C.3a                  |
| 3030930214 | 3C.3a                  |
| 3030930216 | 3C.3a                  |
| 3030930219 | 3C.3a                  |
| 3030930220 | 3C.3a                  |
| 3030930242 | 3C.3a                  |
| 3030930243 | 3C.3a                  |
| 3030930244 | 3C.3a                  |
| 3030930248 | 3C.3a                  |
| 3030930249 | 3C.3a                  |
| 3030930250 | 3C.3a                  |

| ID         | Genetic classification |
|------------|------------------------|
| 3030930291 | 3C.3a                  |
| 3030930292 | 3C.3a                  |
| 3030930294 | 3C.3a                  |
| 3030930295 | 3C.3a                  |
| 3030930296 | 3C.3a                  |
| 3030930297 | 3C.3a                  |
| 3030930298 | 3C.3a                  |
| 3030930299 | 3C.3a                  |
| 3030930301 | 3C.3a                  |
| 3030930302 | 3C.3a                  |
| 3030930303 | 3C.3a                  |
| 3030930304 | 3C.3a                  |
| 3030930305 | 3C.3a                  |
| 3030930306 | 3C.3a                  |
| 3030930307 | 3C.3a                  |
| 3030930308 | 3C.3a                  |
| 3030930309 | 3C.3a                  |
| 3030930310 | 3C.3a                  |
| 3030930311 | 3C.3a                  |
| 3030930312 | 3C.3a                  |
| 3030930313 | 3C.3a                  |
| 3030930314 | 3C.3a                  |
| 3030930315 | 3C.3a                  |
| 3030930316 | 3C.3a                  |
| 3030930317 | 3C.3a                  |
| 3030930318 | 3C.3a                  |
| 3030930319 | 3C.3a                  |
| 3030930320 | 3C.3a                  |
| 3030930321 | 3C.3a                  |
| 3030930322 | 3C.3a                  |
| 3030930323 | 3C.3a                  |
| 3030930324 | 3C.3a                  |
| 3030930356 | 3C.3a                  |
| 3030930357 | 3C.3a                  |
| 3030930358 | 3C.3a                  |
| 3030930359 | 3C.3a                  |
| 3030930360 | 3C.3a                  |
| 3030930361 | 3C.3a                  |
| 3030930362 | 3C.3a                  |
| 3030930363 | 3C.3a                  |
| 3030930364 | 3C.3a                  |
| 3030930366 | 3C.3a                  |
| 3030930367 | 3C.3a                  |
| 3030930368 | 3C.3a                  |
| 3030930369 | 3C.3a                  |

| ID         | Genetic classification |
|------------|------------------------|
| 3030930370 | 3C.3a                  |
| 3030930371 | 3C.3a                  |
| 3030930372 | 3C.3a                  |
| 3030930421 | 3C.3a                  |
| 3030930422 | 3C.3a                  |
| 3030930423 | 3C.3a                  |
| 3030930424 | 3C.3a                  |
| 3030930425 | 3C.3a                  |
| 3030930426 | 3C.3a                  |
| 3030930427 | 3C.3a                  |
| 3030930428 | 3C.3a                  |
| 3030930429 | 3C.3a                  |
| 3030930430 | 3C.3a                  |
| 3030930431 | 3C.3a                  |
| 3030930432 | 3C.3a                  |
| 3030930433 | 3C.3a                  |
| 3030930434 | 3C.3a                  |
| 3030930435 | 3C.3a                  |
| 3030930436 | 3C.3a                  |
| 3030930461 | 3C.3a                  |
| 3030930462 | 3C.3a                  |
| 3030930463 | 3C.3a                  |
| 3030930464 | 3C.3a                  |
| 3030930466 | 3C.3a                  |
| 3030930518 | 3C.3a                  |
| 3030930551 | 3C.3a                  |
| 3030930552 | 3C.3a                  |
| 3030930554 | 3C.3a                  |
| 3030930557 | 3C.3a                  |
| 3030930558 | 3C.3a                  |
| 3030930559 | 3C.3a                  |
| 3030930560 | 3C.3a                  |
| 3030930584 | 3C.3a                  |
| 3030930585 | 3C.3a                  |
| 3030930589 | 3C.3a                  |
| 3030930590 | 3C.3a                  |
| 3030930724 | 3C.3a                  |
| 3030930725 | 3C.3a                  |
| 3030930726 | 3C.3a                  |
| 3030930727 | 3C.3a                  |
| 3030930728 | 3C.3a                  |
| 3030930729 | 3C.3a                  |
| 3030930730 | 3C.3a                  |
| 3030930731 | 3C.3a                  |
| 3030930732 | 3C.3a                  |

| ID         | Genetic classification |
|------------|------------------------|
| 3030930733 | 3C.3a                  |
| 3030930734 | 3C.3a                  |
| 3030930735 | 3C.3a                  |
| 3030930736 | 3C.3a                  |
| 3030930737 | 3C.3a                  |
| 3030930738 | 3C.3a                  |
| 3030930739 | 3C.3a                  |
| 3030930740 | 3C.3a                  |
| 3030930741 | 3C.3a                  |
| 3030930742 | 3C.3a                  |
| 3030930743 | 3C.3a                  |
| 3030930744 | 3C.3a                  |
| 3030930745 | 3C.3a                  |
| 3030930746 | 3C.3a                  |
| 3030930747 | 3C.3a                  |
| 3030930748 | 3C.3a                  |
| 3030930749 | 3C.3a                  |
| 3030930750 | 3C.3a                  |
| 3030930751 | 3C.3a                  |
| 3030930752 | 3C.3a                  |
| 3030930753 | 3C.3a                  |
| 3030930754 | 3C.3a                  |
| 3030930755 | 3C.3a                  |
| 3030930756 | 3C.3a                  |
| 3030930757 | 3C.3a                  |
| 3030930758 | 3C.3a                  |
| 3030930759 | 3C.3a                  |
| 3030930760 | 3C.3a                  |
| 3030930761 | 3C.3a                  |
| 3030930762 | 3C.3a                  |
| 3030930763 | 3C.3a                  |
| 3030930764 | 3C.3a                  |
| 3030930765 | 3C.3a                  |
| 3030930766 | 3C.3a                  |
| 3030930767 | 3C.3a                  |
| 3030930768 | 3C.3a                  |
| 3030930769 | 3C.3a                  |
| 3030930770 | 3C.3a                  |
| 3030930771 | 3C.3a                  |
| 3030930772 | 3C.3a                  |
| 3030930773 | 3C.3a                  |
| 3030930774 | 3C.3a                  |
| 3030930775 | 3C.3a                  |
| 3030930776 | 3C.3a                  |
| 3030930777 | 3C.3a                  |

| ID         | Genetic classification |
|------------|------------------------|
| 3030930778 | 3C.3a                  |
| 3030930779 | 3C.3a                  |
| 3030930781 | 3C.3a                  |
| 3030930782 | 3C.3a                  |
| 3030930783 | 3C.3a                  |
| 3030930784 | 3C.3a                  |
| 3030930785 | 3C.3a                  |
| 3030930786 | 3C.3a                  |
| 3030930787 | 3C.3a                  |
| 3030930788 | 3C.3a                  |
| 3030930789 | 3C.3a                  |
| 3030930790 | 3C.3a                  |
| 3030930791 | 3C.3a                  |
| 3030930792 | 3C.3a                  |
| 3030930793 | 3C.3a                  |
| 3030930836 | 3C.3a                  |
| 3030930837 | 3C.3a                  |
| 3030930838 | 3C.3a                  |
| 3030930839 | 3C.3a                  |
| 3030930840 | 3C.3a                  |
| 3030930841 | 3C.3a                  |
| 3030930842 | 3C.3a                  |
| 3030930843 | 3C.3a                  |
| 3030930844 | 3C.3a                  |
| 3030930845 | 3C.3a                  |
| 3030930846 | 3C.3a                  |
| 3030930847 | 3C.3a                  |
| 3030930848 | 3C.3a                  |
| 3030930849 | 3C.3a                  |
| 3030930850 | 3C.3a                  |
| 3030930851 | 3C.3a                  |
| 3030930852 | 3C.3a                  |
| 3030930853 | 3C.3a                  |
| 3030930854 | 3C.3a                  |
| 3030930855 | 3C.3a                  |
| 3030930857 | 3C.3a                  |
| 3030930858 | 3C.3a                  |
| 3030930859 | 3C.3a                  |
| 3030930860 | 3C.3a                  |
| 3030930862 | 3C.3a                  |
| 3030930863 | 3C.3a                  |
| 3030930864 | 3C.3a                  |
| 3030930865 | 3C.3a                  |
| 3030930866 | 3C.3a                  |
| 3030930867 | 3C.3a                  |

| ID         | Genetic classification |
|------------|------------------------|
| 3030930912 | 3C.3a                  |
| 3030930915 | 3C.3a                  |
| 3030930918 | 3C.3a                  |
| 3030930919 | 3C.3a                  |
| 3030930920 | 3C.3a                  |
| 3030930951 | 3C.3a                  |
| 3030930954 | 3C.3a                  |
| 3030930955 | 3C.3a                  |
| 3030930956 | 3C.3a                  |
| 3030930957 | 3C.3a                  |
| 3030930958 | 3C.3a                  |
| 3030930959 | 3C.3a                  |
| 3030930960 | 3C.3a                  |
| 3030930961 | 3C.3a                  |
| 3030930962 | 3C.3a                  |
| 3030930963 | 3C.3a                  |
| 3030931115 | 3C.3a                  |
| 3030931116 | 3C.3a                  |
| 3030931117 | 3C.3a                  |
| 3030931118 | 3C.3a                  |
| 3030931119 | 3C.3a                  |
| 3030931120 | 3C.3a                  |
| 3030931121 | 3C.3a                  |
| 3030931122 | 3C.3a                  |
| 3030931124 | 3C.3a                  |
| 3030931125 | 3C.3a                  |
| 3030931126 | 3C.3a                  |
| 3030931127 | 3C.3a                  |
| 3030931128 | 3C.3a                  |
| 3030931129 | 3C.3a                  |
| 3030931130 | 3C.3a                  |
| 3030931131 | 3C.3a                  |
| 3030931132 | 3C.3a                  |
| 3030931133 | 3C.3a                  |
| 3030931134 | 3C.3a                  |
| 3030931136 | 3C.3a                  |
| 3030931137 | 3C.3a                  |
| 3030931138 | 3C.3a                  |
| 3030931139 | 3C.3a                  |
| 3030931140 | 3C.3a                  |
| 3030931141 | 3C.3a                  |
| 3030931174 | 3C.3a                  |
| 3030931175 | 3C.3a                  |
| 3030931177 | 3C.3a                  |
| 3030931178 | 3C.3a                  |

| ID         | Genetic classification |
|------------|------------------------|
| 3030931179 | 3C.3a                  |
| 3030931180 | 3C.3a                  |
| 3030931181 | 3C.3a                  |
| 3030931183 | 3C.3a                  |
| 3030931185 | 3C.3a                  |
| 3030931186 | 3C.3a                  |
| 3030931187 | 3C.3a                  |
| 3030931188 | 3C.3a                  |
| 3030931189 | 3C.3a                  |
| 3030931190 | 3C.3a                  |
| 3030931191 | 3C.3a                  |
| 3030931194 | 3C.3a                  |
| 3030931195 | 3C.3a                  |
| 3030931196 | 3C.3a                  |
| 3030931197 | 3C.3a                  |
| 3030931198 | 3C.3a                  |
| 3030931199 | 3C.3a                  |
| 3030931200 | 3C.3a                  |
| 3030931201 | 3C.3a                  |
| 3030931202 | 3C.3a                  |
| 3030931203 | 3C.3a                  |
| 3030931204 | 3C.3a                  |
| 3030931205 | 3C.3a                  |
| 3030931206 | 3C.3a                  |
| 3030931207 | 3C.3a                  |
| 3030931208 | 3C.3a                  |
| 3030931209 | 3C.3a                  |
| 3030931210 | 3C.3a                  |
| 3030931211 | 3C.3a                  |
| 3030931212 | 3C.3a                  |
| 3030931364 | 3C.3a                  |
| 3030931365 | 3C.3a                  |
| 3030931367 | 3C.3a                  |
| 3030931368 | 3C.3a                  |
| 3030931369 | 3C.3a                  |
| 3030931370 | 3C.3a                  |
| 3030931372 | 3C.3a                  |
| 3030931373 | 3C.3a                  |
| 3030931374 | 3C.3a                  |
| 3030931375 | 3C.3a                  |
| 3030931376 | 3C.3a                  |
| 3030931377 | 3C.3a                  |
| 3030931379 | 3C.3a                  |
| 3030931380 | 3C.3a                  |
| 3030931381 | 3C.3a                  |



| ID         | Genetic classification |
|------------|------------------------|
| 3030931382 | 3C.3a                  |
| 3030931383 | 3C.3a                  |
| 3030931384 | 3C.3a                  |
| 3030931385 | 3C.3a                  |
| 3030931386 | 3C.3a                  |
| 3030931387 | 3C.3a                  |
| 3030931388 | 3C.3a                  |
| 3030931389 | 3C.3a                  |
| 3030931390 | 3C.3a                  |
| 3030931391 | 3C.3a                  |
| 3030931392 | 3C.3a                  |
| 3030931393 | 3C.3a                  |
| 3030931394 | 3C.3a                  |
| 3030931395 | 3C.3a                  |
| 3030931397 | 3C.3a                  |
| 3030931398 | 3C.3a                  |
| 3030931399 | 3C.3a                  |
| 3030931400 | 3C.3a                  |
| 3030931401 | 3C.3a                  |
| 3030931402 | 3C.3a                  |
| 3030931403 | 3C.3a                  |
| 3030931404 | 3C.3a                  |
| 3030931405 | 3C.3a                  |
| 3030931407 | 3C.3a                  |
| 3030931408 | 3C.3a                  |
| 3030931409 | 3C.3a                  |
| 3030931410 | 3C.3a                  |
| 3030931411 | 3C.3a                  |
| 3030931412 | 3C.3a                  |
| 3030931413 | 3C.3a                  |
| 3030931414 | 3C.3a                  |
| 3030931415 | 3C.3a                  |
| 3030931416 | 3C.3a                  |
| 3030931417 | 3C.3a                  |
| 3030931418 | 3C.3a                  |
| 3030931419 | 3C.3a                  |
| 3030931420 | 3C.3a                  |
| 3030931421 | 3C.3a                  |
| 3030931422 | 3C.3a                  |
| 3030931423 | 3C.3a                  |
| 3030931424 | 3C.3a                  |
| 3030931425 | 3C.3a                  |
| 3030931426 | 3C.3a                  |
| 3030931427 | 3C.3a                  |
| 3030931428 | 3C.3a                  |

| ID         | Genetic classification |
|------------|------------------------|
| 3030931429 | 3C.3a                  |
| 3030931430 | 3C.3a                  |
| 3030931431 | 3C.3a                  |
| 3030931432 | 3C.3a                  |
| 3030931434 | 3C.3a                  |
| 3030931435 | 3C.3a                  |
| 3030931436 | 3C.3a                  |
| 3030931437 | 3C.3a                  |
| 3030931438 | 3C.3a                  |
| 3030931439 | 3C.3a                  |
| 3030931440 | 3C.3a                  |
| 3030931441 | 3C.3a                  |
| 3030931442 | 3C.3a                  |
| 3030931443 | 3C.3a                  |
| 3030931444 | 3C.3a                  |
| 3030931445 | 3C.3a                  |
| 3030931446 | 3C.3a                  |
| 3030931447 | 3C.3a                  |
| 3030931448 | 3C.3a                  |
| 3030931449 | 3C.3a                  |
| 3030931450 | 3C.3a                  |
| 3030931451 | 3C.3a                  |
| 3030931452 | 3C.3a                  |
| 3030931453 | 3C.3a                  |
| 3030931454 | 3C.3a                  |
| 3030931455 | 3C.3a                  |
| 3030931456 | 3C.3a                  |
| 3030931457 | 3C.3a                  |
| 3030931458 | 3C.3a                  |
| 3030931459 | 3C.3a                  |
| 3030931460 | 3C.3a                  |
| 3030931461 | 3C.3a                  |
| 3030931588 | 3C.3a                  |
| 3030931589 | 3C.3a                  |
| 3030931590 | 3C.3a                  |
| 3030931591 | 3C.3a                  |
| 3030931592 | 3C.3a                  |
| 3030931593 | 3C.3a                  |
| 3030931594 | 3C.3a                  |
| 3030931595 | 3C.3a                  |
| 3030931597 | 3C.3a                  |
| 3030931598 | 3C.3a                  |
| 3030931599 | 3C.3a                  |
| 3030931600 | 3C.3a                  |
| 3030931601 | 3C.3a                  |

| ID         | Genetic classification |
|------------|------------------------|
| 3030931602 | 3C.3a                  |
| 3030931604 | 3C.3a                  |
| 3030931605 | 3C.3a                  |
| 3030931607 | 3C.3a                  |
| 3030931608 | 3C.3a                  |
| 3030931609 | 3C.3a                  |
| 3030931610 | 3C.3a                  |
| 3030931612 | 3C.3a                  |
| 3030931613 | 3C.3a                  |
| 3030931614 | 3C.3a                  |
| 3030931615 | 3C.3a                  |
| 3030931621 | 3C.3a                  |
| 3030931622 | 3C.3a                  |
| 3030931624 | 3C.3a                  |
| 3030931625 | 3C.3a                  |
| 3030931626 | 3C.3a                  |
| 3030931628 | 3C.3a                  |
| 3030931629 | 3C.3a                  |
| 3030931630 | 3C.3a                  |
| 3030931631 | 3C.3a                  |
| 3030931632 | 3C.3a                  |
| 3030931633 | 3C.3a                  |
| 3030931634 | 3C.3a                  |
| 3030931635 | 3C.3a                  |
| 3030931638 | 3C.3a                  |
| 3030931639 | 3C.3a                  |
| 3030931640 | 3C.3a                  |
| 3030931641 | 3C.3a                  |
| 3030931642 | 3C.3a                  |
| 3030931643 | 3C.3a                  |
| 3030931644 | 3C.3a                  |
| 3030931645 | 3C.3a                  |
| 3030931646 | 3C.3a                  |
| 3030931647 | 3C.3a                  |
| 3030931648 | 3C.3a                  |
| 3030931650 | 3C.3a                  |
| 3030931651 | 3C.3a                  |
| 3030931652 | 3C.3a                  |
| 3030931654 | 3C.3a                  |
| 3030931655 | 3C.3a                  |
| 3030931656 | 3C.3a                  |
| 3030931658 | 3C.3a                  |
| 3030931659 | 3C.3a                  |
| 3030931660 | 3C.3a                  |
| 3030931661 | 3C.3a                  |

| ID         | Genetic classification |
|------------|------------------------|
| 3030931662 | 3C.3a                  |
| 3030931663 | 3C.3a                  |
| 3030931665 | 3C.3a                  |
| 3030931666 | 3C.3a                  |
| 3030931667 | 3C.3a                  |
| 3030931668 | 3C.3a                  |
| 3030931669 | 3C.3a                  |
| 3030931670 | 3C.3a                  |
| 3030931671 | 3C.3a                  |
| 3030931673 | 3C.3a                  |
| 3030931674 | 3C.3a                  |
| 3030931676 | 3C.3a                  |
| 3030931677 | 3C.3a                  |
| 3030931678 | 3C.3a                  |
| 3030931679 | 3C.3a                  |
| 3030931682 | 3C.3a                  |
| 3030931683 | 3C.3a                  |
| 3030931684 | 3C.3a                  |
| 3030931685 | 3C.3a                  |
| 3030931686 | 3C.3a                  |
| 3030931687 | 3C.3a                  |
| 3030931688 | 3C.3a                  |
| 3030931689 | 3C.3a                  |
| 3030931690 | 3C.3a                  |
| 3030931691 | 3C.3a                  |
| 3030931692 | 3C.3a                  |
| 3030931695 | 3C.3a                  |
| 3030931697 | 3C.3a                  |
| 3030931698 | 3C.3a                  |
| 3030931699 | 3C.3a                  |
| 3030931700 | 3C.3a                  |
| 3030931701 | 3C.3a                  |
| 3030931702 | 3C.3a                  |
| 3030931703 | 3C.3a                  |
| 3030931704 | 3C.3a                  |
| 3030931706 | 3C.3a                  |
| 3030931707 | 3C.3a                  |
| 3030931708 | 3C.3a                  |
| 3030931709 | 3C.3a                  |
| 3030931710 | 3C.3a                  |
| 3030931711 | 3C.3a                  |
| 3030931712 | 3C.3a                  |
| 3030931713 | 3C.3a                  |
| 3030931714 | 3C.3a                  |
| 3030931715 | 3C.3a                  |

| ID         | Genetic classification |
|------------|------------------------|
| 3030931716 | 3C.3a                  |
| 3030931717 | 3C.3a                  |
| 3030931718 | 3C.3a                  |
| 3030931719 | 3C.3a                  |
| 3030931720 | 3C.3a                  |
| 3030931721 | 3C.3a                  |
| 3030931722 | 3C.3a                  |
| 3030931723 | 3C.3a                  |
| 3030931724 | 3C.3a                  |
| 3030931725 | 3C.3a                  |
| 3030931726 | 3C.3a                  |
| 3030931727 | 3C.3a                  |
| 3030931728 | 3C.3a                  |
| 3030931729 | 3C.3a                  |
| 3030931730 | 3C.3a                  |
| 3030931731 | 3C.3a                  |
| 3030931732 | 3C.3a                  |
| 3030931733 | 3C.3a                  |
| 3030931734 | 3C.3a                  |
| 3030931736 | 3C.3a                  |
| 3030931737 | 3C.3a                  |
| 3030931738 | 3C.3a                  |
| 3030931739 | 3C.3a                  |
| 3030931740 | 3C.3a                  |
| 3030931741 | 3C.3a                  |
| 3030931742 | 3C.3a                  |
| 3030931743 | 3C.3a                  |
| 3030931744 | 3C.3a                  |
| 3030931745 | 3C.3a                  |
| 3030931746 | 3C.3a                  |
| 3030931747 | 3C.3a                  |
| 3030931748 | 3C.3a                  |
| 3030931749 | 3C.3a                  |
| 3030931750 | 3C.3a                  |
| 3030931751 | 3C.3a                  |
| 3030931752 | 3C.3a                  |
| 3030931753 | 3C.3a                  |
| 3030931754 | 3C.3a                  |
| 3030931756 | 3C.3a                  |
| 3030931757 | 3C.3a                  |
| 3030931758 | 3C.3a                  |
| 3030931759 | 3C.3a                  |
| 3030931760 | 3C.3a                  |
| 3030931761 | 3C.3a                  |
| 3030931762 | 3C.3a                  |

| ID         | Genetic classification |
|------------|------------------------|
| 3030931764 | 3C.3a                  |
| 3030931765 | 3C.3a                  |
| 3030931766 | 3C.3a                  |
| 3030931767 | 3C.3a                  |
| 3030931768 | 3C.3a                  |
| 3030931769 | 3C.3a                  |
| 3030931771 | 3C.3a                  |
| 3030931772 | 3C.3a                  |
| 3030931773 | 3C.3a                  |
| 3030931774 | 3C.3a                  |
| 3030931776 | 3C.3a                  |
| 3030931778 | 3C.3a                  |
| 3030931779 | 3C.3a                  |
| 3030931780 | 3C.3a                  |
| 3030931781 | 3C.3a                  |
| 3030931783 | 3C.3a                  |
| 3030931784 | 3C.3a                  |
| 3030931785 | 3C.3a                  |
| 3030931788 | 3C.3a                  |
| 3030931789 | 3C.3a                  |
| 3030931790 | 3C.3a                  |
| 3030931791 | 3C.3a                  |
| 3030931793 | 3C.3a                  |
| 3030931794 | 3C.3a                  |
| 3030931796 | 3C.3a                  |
| 3030931797 | 3C.3a                  |
| 3030931799 | 3C.3a                  |
| 3030931800 | 3C.3a                  |
| 3030931801 | 3C.3a                  |
| 3030931802 | 3C.3a                  |
| 3030931803 | 3C.3a                  |
| 3030931804 | 3C.3a                  |
| 3030931805 | 3C.3a                  |
| 3030931806 | 3C.3a                  |
| 3030931807 | 3C.3a                  |
| 3030931808 | 3C.3a                  |
| 3030931809 | 3C.3a                  |
| 3030931811 | 3C.3a                  |
| 3030931812 | 3C.3a                  |
| 3030931813 | 3C.3a                  |
| 3030931814 | 3C.3a                  |
| 3030931815 | 3C.3a                  |
| 3030931975 | 3C.3a                  |
| 3030931976 | 3C.3a                  |
| 3030931977 | 3C.3a                  |

| ID         | Genetic classification |
|------------|------------------------|
| 3030931978 | 3C.3a                  |
| 3030931980 | 3C.3a                  |
| 3030931981 | 3C.3a                  |
| 3030931982 | 3C.3a                  |
| 3030931983 | 3C.3a                  |
| 3030931984 | 3C.3a                  |
| 3030931985 | 3C.3a                  |
| 3030931986 | 3C.3a                  |
| 3030931987 | 3C.3a                  |
| 3030931988 | 3C.3a                  |
| 3030931989 | 3C.3a                  |
| 3030931990 | 3C.3a                  |
| 3030931992 | 3C.3a                  |
| 3030931993 | 3C.3a                  |
| 3030932014 | 3C.3a                  |
| 3030932015 | 3C.3a                  |
| 3030932016 | 3C.3a                  |
| 3030932017 | 3C.3a                  |
| 3030932018 | 3C.3a                  |
| 3030932019 | 3C.3a                  |
| 3030932020 | 3C.3a                  |
| 3030932021 | 3C.3a                  |
| 3030932022 | 3C.3a                  |
| 3030932023 | 3C.3a                  |
| 3030932024 | 3C.3a                  |
| 3030932025 | 3C.3a                  |
| 3030932026 | 3C.3a                  |
| 3030932027 | 3C.3a                  |
| 3030932028 | 3C.3a                  |
| 3030932029 | 3C.3a                  |
| 3030932030 | 3C.3a                  |
| 3030932031 | 3C.3a                  |
| 3030932032 | 3C.3a                  |
| 3030932033 | 3C.3a                  |
| 3030932034 | 3C.3a                  |
| 3030932035 | 3C.3a                  |
| 3030932036 | 3C.3a                  |
| 3030932037 | 3C.3a                  |
| 3030932038 | 3C.3a                  |
| 3030932039 | 3C.3a                  |
| 3030932040 | 3C.3a                  |
| 3030932041 | 3C.3a                  |
| 3030932042 | 3C.3a                  |
| 3030932043 | 3C.3a                  |
| 3030932044 | 3C.3a                  |

| ID         | Genetic classification |
|------------|------------------------|
| 3030932045 | 3C.3a                  |
| 3030932046 | 3C.3a                  |
| 3030932047 | 3C.3a                  |
| 3030932048 | 3C.3a                  |
| 3030932049 | 3C.3a                  |
| 3030932050 | 3C.3a                  |
| 3030932051 | 3C.3a                  |
| 3030932052 | 3C.3a                  |
| 3030932053 | 3C.3a                  |
| 3030932054 | 3C.3a                  |
| 3030932055 | 3C.3a                  |
| 3030932056 | 3C.3a                  |
| 3030932057 | 3C.3a                  |
| 3030932058 | 3C.3a                  |
| 3030932059 | 3C.3a                  |
| 3030932060 | 3C.3a                  |
| 3030932061 | 3C.3a                  |
| 3030932062 | 3C.3a                  |
| 3030932063 | 3C.3a                  |
| 3030932065 | 3C.3a                  |
| 3030932066 | 3C.3a                  |
| 3030932067 | 3C.3a                  |
| 3030932077 | 3C.3a                  |
| 3030932078 | 3C.3a                  |
| 3030932079 | 3C.3a                  |
| 3030932080 | 3C.3a                  |
| 3030932081 | 3C.3a                  |
| 3030932083 | 3C.3a                  |
| 3030932084 | 3C.3a                  |
| 3030932085 | 3C.3a                  |
| 3030932086 | 3C.3a                  |
| 3030932087 | 3C.3a                  |
| 3030932088 | 3C.3a                  |
| 3030932089 | 3C.3a                  |
| 3030932090 | 3C.3a                  |
| 3030932091 | 3C.3a                  |
| 3030932092 | 3C.3a                  |
| 3030932094 | 3C.3a                  |
| 3030932095 | 3C.3a                  |
| 3030932096 | 3C.3a                  |
| 3030932097 | 3C.3a                  |
| 3030932098 | 3C.3a                  |
| 3030932099 | 3C.3a                  |
| 3030932100 | 3C.3a                  |
| 3030932101 | 3C.3a                  |



| ID         | Genetic classification |
|------------|------------------------|
| 3030932102 | 3C.3a                  |
| 3030932104 | 3C.3a                  |
| 3030932105 | 3C.3a                  |
| 3030932106 | 3C.3a                  |
| 3030932107 | 3C.3a                  |
| 3030932108 | 3C.3a                  |
| 3030932109 | 3C.3a                  |
| 3030932110 | 3C.3a                  |
| 3030932111 | 3C.3a                  |
| 3030932112 | 3C.3a                  |
| 3030932113 | 3C.3a                  |
| 3030932114 | 3C.3a                  |
| 3030932115 | 3C.3a                  |
| 3030932116 | 3C.3a                  |
| 3030932117 | 3C.3a                  |
| 3030932118 | 3C.3a                  |
| 3030932119 | 3C.3a                  |
| 3030932120 | 3C.3a                  |
| 3030932121 | 3C.3a                  |
| 3030932122 | 3C.3a                  |
| 3030932123 | 3C.3a                  |
| 3030932253 | 3C.3a                  |
| 3030932254 | 3C.3a                  |
| 3030932255 | 3C.3a                  |
| 3030932256 | 3C.3a                  |
| 3030932257 | 3C.3a                  |
| 3030932258 | 3C.3a                  |
| 3030932259 | 3C.3a                  |
| 3030932260 | 3C.3a                  |
| 3030932261 | 3C.3a                  |
| 3030932262 | 3C.3a                  |
| 3030932263 | 3C.3a                  |
| 3030932264 | 3C.3a                  |
| 3030932266 | 3C.3a                  |
| 3030932268 | 3C.3a                  |
| 3030932269 | 3C.3a                  |
| 3030932270 | 3C.3a                  |
| 3030932271 | 3C.3a                  |
| 3030932272 | 3C.3a                  |
| 3030932273 | 3C.3a                  |
| 3030932275 | 3C.3a                  |
| 3030932276 | 3C.3a                  |
| 3030932278 | 3C.3a                  |
| 3030932279 | 3C.3a                  |
| 3030932280 | 3C.3a                  |

| ID         | Genetic classification |
|------------|------------------------|
| 3030932281 | 3C.3a                  |
| 3030932282 | 3C.3a                  |
| 3030932283 | 3C.3a                  |
| 3030932284 | 3C.3a                  |
| 3030932285 | 3C.3a                  |
| 3030932286 | 3C.3a                  |
| 3030932287 | 3C.3a                  |
| 3030932288 | 3C.3a                  |
| 3030932289 | 3C.3a                  |
| 3030932290 | 3C.3a                  |
| 3030932291 | 3C.3a                  |
| 3030932292 | 3C.3a                  |
| 3030932294 | 3C.3a                  |
| 3030932295 | 3C.3a                  |
| 3030932296 | 3C.3a                  |
| 3030932297 | 3C.3a                  |
| 3030932299 | 3C.3a                  |
| 3030932300 | 3C.3a                  |
| 3030932301 | 3C.3a                  |
| 3030932302 | 3C.3a                  |
| 3030932303 | 3C.3a                  |
| 3030932304 | 3C.3a                  |
| 3030932305 | 3C.3a                  |
| 3030932306 | 3C.3a                  |
| 3030932307 | 3C.3a                  |
| 3030932308 | 3C.3a                  |
| 3030932309 | 3C.3a                  |
| 3030932310 | 3C.3a                  |
| 3030932311 | 3C.3a                  |
| 3030932312 | 3C.3a                  |
| 3030932313 | 3C.3a                  |
| 3030932314 | 3C.3a                  |
| 3030932315 | 3C.3a                  |
| 3030932316 | 3C.3a                  |
| 3030932320 | 3C.3a                  |
| 3030932321 | 3C.3a                  |
| 3030932322 | 3C.3a                  |
| 3030932323 | 3C.3a                  |
| 3030932324 | 3C.3a                  |
| 3030932325 | 3C.3a                  |
| 3030932326 | 3C.3a                  |
| 3030932327 | 3C.3a                  |
| 3030932328 | 3C.3a                  |
| 3030932329 | 3C.3a                  |
| 3030932330 | 3C.3a                  |

| ID         | Genetic classification |
|------------|------------------------|
| 3030932331 | 3C.3a                  |
| 3030932332 | 3C.3a                  |
| 3030932334 | 3C.3a                  |
| 3030932335 | 3C.3a                  |
| 3030932336 | 3C.3a                  |
| 3030932378 | 3C.3a                  |
| 3030932379 | 3C.3a                  |
| 3030932380 | 3C.3a                  |
| 3030932381 | 3C.3a                  |
| 3030932382 | 3C.3a                  |
| 3030932383 | 3C.3a                  |
| 3030932384 | 3C.3a                  |
| 3030932385 | 3C.3a                  |
| 3030932386 | 3C.3a                  |
| 3030932387 | 3C.3a                  |
| 3030932388 | 3C.3a                  |
| 3030932389 | 3C.3a                  |
| 3030932390 | 3C.3a                  |
| 3030932391 | 3C.3a                  |
| 3030932392 | 3C.3a                  |
| 3030932393 | 3C.3a                  |
| 3030932394 | 3C.3a                  |
| 3030932395 | 3C.3a                  |
| 3030932396 | 3C.3a                  |
| 3030932397 | 3C.3a                  |
| 3030932398 | 3C.3a                  |
| 3030932399 | 3C.3a                  |
| 3030932400 | 3C.3a                  |
| 3030932401 | 3C.3a                  |
| 3030932402 | 3C.3a                  |
| 3030932403 | 3C.3a                  |
| 3030932404 | 3C.3a                  |
| 3030932405 | 3C.3a                  |
| 3030932406 | 3C.3a                  |
| 3030932407 | 3C.3a                  |
| 3030932408 | 3C.3a                  |
| 3030932409 | 3C.3a                  |
| 3030932410 | 3C.3a                  |
| 3030932420 | 3C.3a                  |
| 3030932421 | 3C.3a                  |
| 3030932422 | 3C.3a                  |
| 3030932423 | 3C.3a                  |
| 3030932424 | 3C.3a                  |
| 3030932425 | 3C.3a                  |
| 3030932426 | 3C.3a                  |

| ID         | Genetic classification |
|------------|------------------------|
| 3030932427 | 3C.3a                  |
| 3030932428 | 3C.3a                  |
| 3030932429 | 3C.3a                  |
| 3030932430 | 3C.3a                  |
| 3030932431 | 3C.3a                  |
| 3030932432 | 3C.3a                  |
| 3030932433 | 3C.3a                  |
| 3030932434 | 3C.3a                  |
| 3030932435 | 3C.3a                  |
| 3030932436 | 3C.3a                  |
| 3030932437 | 3C.3a                  |
| 3030932438 | 3C.3a                  |
| 3030932439 | 3C.3a                  |
| 3030932440 | 3C.3a                  |
| 3030932441 | 3C.3a                  |
| 3030932442 | 3C.3a                  |
| 3030932443 | 3C.3a                  |
| 3030932445 | 3C.3a                  |
| 3030932483 | 3C.3a                  |
| 3030932484 | 3C.3a                  |
| 3030932485 | 3C.3a                  |
| 3030932486 | 3C.3a                  |
| 3030932487 | 3C.3a                  |
| 3030932488 | 3C.3a                  |
| 3030932489 | 3C.3a                  |
| 3030932490 | 3C.3a                  |
| 3030932491 | 3C.3a                  |
| 3030932492 | 3C.3a                  |
| 3030932493 | 3C.3a                  |
| 3030932494 | 3C.3a                  |
| 3030932495 | 3C.3a                  |
| 3030932496 | 3C.3a                  |
| 3030932497 | 3C.3a                  |
| 3030932498 | 3C.3a                  |
| 3030932499 | 3C.3a                  |
| 3030932517 | 3C.3a                  |
| 3030932518 | 3C.3a                  |
| 3030932519 | 3C.3a                  |
| 3030932520 | 3C.3a                  |
| 3030932521 | 3C.3a                  |
| 3030932522 | 3C.3a                  |
| 3030932523 | 3C.3a                  |
| 3030932524 | 3C.3a                  |
| 3030932525 | 3C.3a                  |
| 3030932526 | 3C.3a                  |

| ID         | Genetic classification |
|------------|------------------------|
| 3030932527 | 3C.3a                  |
| 3030932528 | 3C.3a                  |
| 3030932529 | 3C.3a                  |
| 3030932531 | 3C.3a                  |
| 3030932532 | 3C.3a                  |
| 3030932534 | 3C.3a                  |
| 3030932535 | 3C.3a                  |
| 3030932536 | 3C.3a                  |
| 3030932538 | 3C.3a                  |
| 3030932539 | 3C.3a                  |
| 3030932540 | 3C.3a                  |
| 3030932541 | 3C.3a                  |
| 3030932542 | 3C.3a                  |
| 3030932544 | 3C.3a                  |
| 3030932545 | 3C.3a                  |
| 3030932546 | 3C.3a                  |
| 3030932547 | 3C.3a                  |
| 3030932548 | 3C.3a                  |
| 3030932549 | 3C.3a                  |
| 3030932550 | 3C.3a                  |
| 3030932551 | 3C.3a                  |
| 3030932552 | 3C.3a                  |
| 3030932553 | 3C.3a                  |
| 3030932554 | 3C.3a                  |
| 3030932555 | 3C.3a                  |
| 3030932556 | 3C.3a                  |
| 3030932557 | 3C.3a                  |
| 3030932558 | 3C.3a                  |
| 3030932559 | 3C.3a                  |
| 3030932560 | 3C.3a                  |
| 3030932561 | 3C.3a                  |
| 3030932562 | 3C.3a                  |
| 3030932563 | 3C.3a                  |
| 3030932564 | 3C.3a                  |
| 3030932565 | 3C.3a                  |
| 3030932566 | 3C.3a                  |
| 3030932567 | 3C.3a                  |
| 3030932569 | 3C.3a                  |
| 3030932570 | 3C.3a                  |
| 3030932571 | 3C.3a                  |
| 3030932572 | 3C.3a                  |
| 3030932573 | 3C.3a                  |
| 3030932574 | 3C.3a                  |
| 3030932575 | 3C.3a                  |
| 3030932576 | 3C.3a                  |

| ID         | Genetic classification |
|------------|------------------------|
| 3030932577 | 3C.3a                  |
| 3030932578 | 3C.3a                  |
| 3030932580 | 3C.3a                  |
| 3030932581 | 3C.3a                  |
| 3030932582 | 3C.3a                  |
| 3030932583 | 3C.3a                  |
| 3030932584 | 3C.3a                  |
| 3030932585 | 3C.3a                  |
| 3030932586 | 3C.3a                  |
| 3030932587 | 3C.3a                  |
| 3030932588 | 3C.3a                  |
| 3030932589 | 3C.3a                  |
| 3030932590 | 3C.3a                  |
| 3030932591 | 3C.3a                  |
| 3030932592 | 3C.3a                  |
| 3030932593 | 3C.3a                  |
| 3030932594 | 3C.3a                  |
| 3030932595 | 3C.3a                  |
| 3030932596 | 3C.3a                  |
| 3030932597 | 3C.3a                  |
| 3030932598 | 3C.3a                  |
| 3030932599 | 3C.3a                  |
| 3030932600 | 3C.3a                  |
| 3030932601 | 3C.3a                  |
| 3030932602 | 3C.3a                  |
| 3030932603 | 3C.3a                  |
| 3030932604 | 3C.3a                  |
| 3030932605 | 3C.3a                  |
| 3030932606 | 3C.3a                  |
| 3030932607 | 3C.3a                  |
| 3030932608 | 3C.3a                  |
| 3030932609 | 3C.3a                  |
| 3030932610 | 3C.3a                  |
| 3030932611 | 3C.3a                  |
| 3030932612 | 3C.3a                  |
| 3030932613 | 3C.3a                  |
| 3030932614 | 3C.3a                  |
| 3030932615 | 3C.3a                  |
| 3030932616 | 3C.3a                  |
| 3030932617 | 3C.3a                  |
| 3030932618 | 3C.3a                  |
| 3030932619 | 3C.3a                  |
| 3030932620 | 3C.3a                  |
| 3030932621 | 3C.3a                  |
| 3030932622 | 3C.3a                  |

| ID         | Genetic classification |
|------------|------------------------|
| 3030932623 | 3C.3a                  |
| 3030932624 | 3C.3a                  |
| 3030933058 | 3C.3a                  |
| 3030933059 | 3C.3a                  |
| 3030933060 | 3C.3a                  |
| 3030933061 | 3C.3a                  |
| 3030933062 | 3C.3a                  |
| 3030933063 | 3C.3a                  |
| 3030933064 | 3C.3a                  |
| 3030933065 | 3C.3a                  |
| 3030933066 | 3C.3a                  |
| 3030933067 | 3C.3a                  |
| 3030933068 | 3C.3a                  |
| 3030933069 | 3C.3a                  |
| 3030933070 | 3C.3a                  |
| 3030933071 | 3C.3a                  |
| 3030933072 | 3C.3a                  |
| 3030933073 | 3C.3a                  |
| 3030933074 | 3C.3a                  |
| 3030929738 | Y3                     |
| 3030930077 | Y3                     |
| 3030930094 | Y3                     |
| 3030930870 | Y3                     |
| 3030930871 | Y3                     |
| 3030930873 | Y3                     |
| 3030931994 | Y3                     |
| 3030932070 | Y3                     |
| 3030932071 | Y3                     |
| 3030932072 | Y3                     |
| 3030932073 | Y3                     |
| 3030932074 | Y3                     |
| 3030932419 | Y3                     |
| 3030932500 | Y3                     |
| 3030930325 | V1A                    |
| 3030930326 | V1A                    |
| 3030930794 | V1A                    |
| 3030931143 | V1A                    |
| 3030930093 | V1A.1                  |
| 3030930869 | V1A.1                  |
| 3030931142 | V1A.1                  |
| 3030932068 | V1A.1                  |
| 3030932069 | V1A.1                  |
| 3030932418 | V1A.1                  |
| 3030931616 | V1A.2                  |
| 3030931617 | V1A.2                  |

| ID         | Genetic classification |
|------------|------------------------|
| 3030931618 | V1A.2                  |
| 3030931619 | V1A.2                  |
| 3030931995 | V1A.2                  |
| 3030932251 | V1A.2                  |
